# Supplementary material
Source: PubMed Central journal article supplement (PMC6127508)
Supplement: mmc1.pdf [file mmc1.pdf]

## **Supplemental Information**

### **Correction of Biochemical Abnormalities and Improved Muscle Function in a Phase I/II Clinical Trial of Clenbuterol in Pompe Disease**

**Dwight D. Koeberl, Laura E. Case, Edward C. Smith, Crista Walters, Sang-oh Han, Yanzhen Li, Wei Chen, Christoph P. Hornik, Kim M. Huffman, William E. Kraus, Beth L. Thurberg, David L. Corcoran, Deeksha Bali, Nenad Bursac, and Priya S. Kishnani**

## Supplemental Material

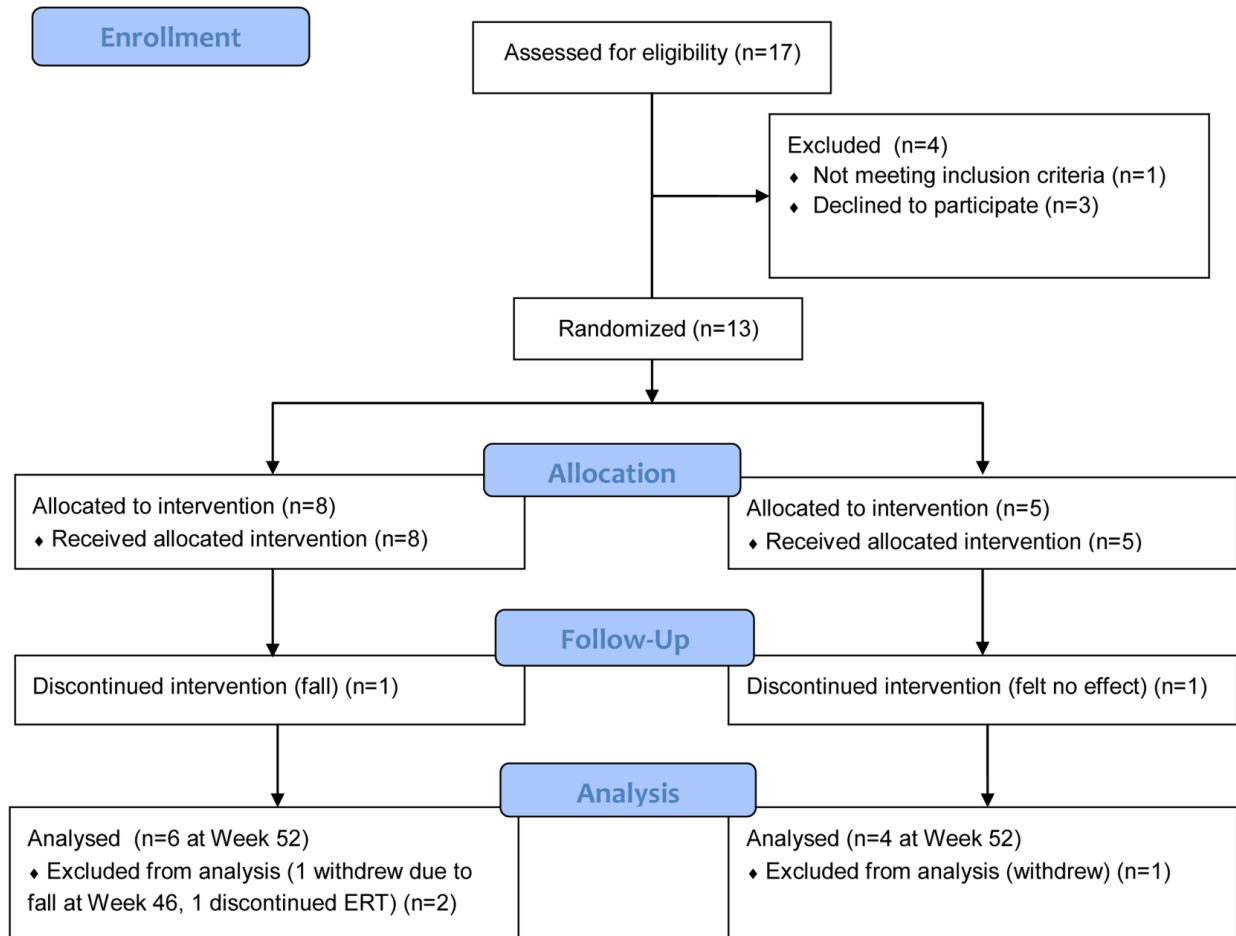

**Supplemental Figure 1: Disposition of participants.** CONSORT 2010 flow diagram for the study.

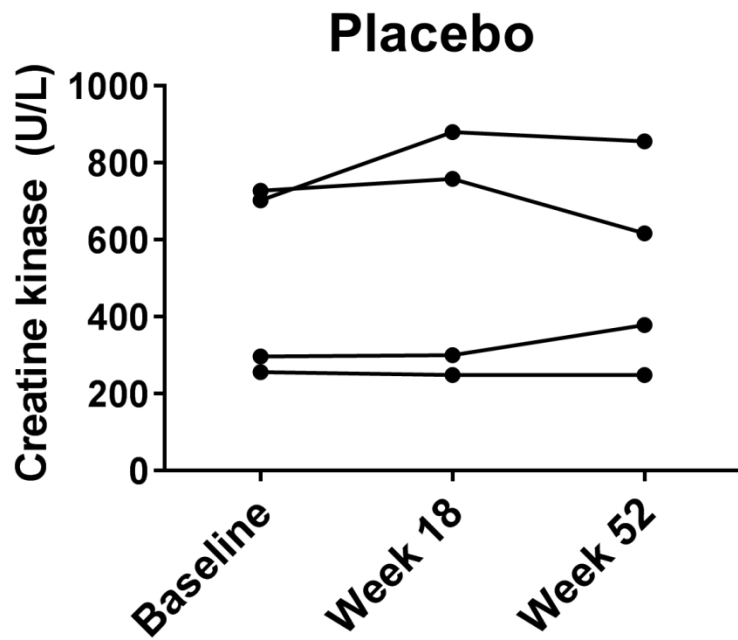

Supplemental Figure 2: CK for placebo group. Individual CK concentrations shown.
